# Supplementary material for: 3D nanocrystalline metal–organic framework materials for the improved output performance of triboelectric nanogenerators
Source: Royal Society of Chemistry journal article supplement (doi:10.1039/d2dt03477h), 2022-12-06
Supplement: d2dt03477h1.pdf [file d2dt03477h1.pdf]

## **3D nano crystalline metal-organic framework materials improve output performance of triboelectric nanogenerator**

Kexin Gao<sup>a,+</sup> Junshuai Chen,<sup>a,+</sup> Mengting Zhao,<sup>a</sup> Rentang Hu,<sup>a</sup> Shiheng Chen,<sup>a</sup> Xiaojing Xue,<sup>b</sup> Zhichao Shao,<sup>\*,a</sup> and Hongwei Hou<sup>\*,b</sup>

<sup>[a]</sup> Center for Advanced Materials Research, Zhongyuan University of Technology, Zhengzhou 450007, P. R. China.

<sup>[b]</sup> College of Chemistry, Zhengzhou University, Zhengzhou, Henan, 450001, P. R. China

<sup>[+]</sup> These authors contributed equally to this work.

E-mail address: *shaozhichao@zut.edu.cn*, *houhongw@zzu.edu.cn*

## Supporting Information

**Fig. S1** Chemical structure of twisted organic ligand.

**Fig. S2** The possible modes of charge transfer in Cd-MOF.

**Fig. S3** PXRD pattern of Cd-MOF.

**Fig. S4** XPS full spectra of Cd-MOF.

**Fig. S5**  $I_{SC}$  of Cd-MT at 1 Hz.

**Fig. S6**  $I_{SC}$  of Cd-MT at 2 Hz.

**Fig. S7**  $I_{SC}$  of Cd-MT at 4 Hz.

**Fig. S8**  $I_{SC}$  of Cd-MT at 6 Hz.

**Fig. S9**  $I_{SC}$  of Cd-MT at 8 Hz.

**Fig. S10**  $V_o$  of Cd-MT at different frequency.

**Fig. S11**  $V_o$  of Cd-MT at 5 Hz.

**Fig. S12** Effect of temperature on output performance in Cd-MT.

**Fig. S13** SEM images of Cd-MOF on the Cu layer.

**Fig. S14** EDS elemental analysis of PVDF layer.

**Fig. S15** High-definition digital and SEM images of PVDF layer.

**Fig. S16** EDS images of PVDF layer

**Fig. S17** Uv-vis spectra of Cd-MOF.

**Fig. S18** Tauc plot of Cd-MOF.

**Fig. S19**  $I_{SC}$  of Cd-MT through a rectifier bridge.

**Fig. S20** Charging of 100  $\mu$ F capacitor using Cd-MT at 5Hz.

**Table S1** Crystallographic data and structure refinement details for Cd-MOF.

**Table S2** Selected bond lengths ( $\text{\AA}$ ) and bond angles (deg) for Cd-MOF crystal structure description.

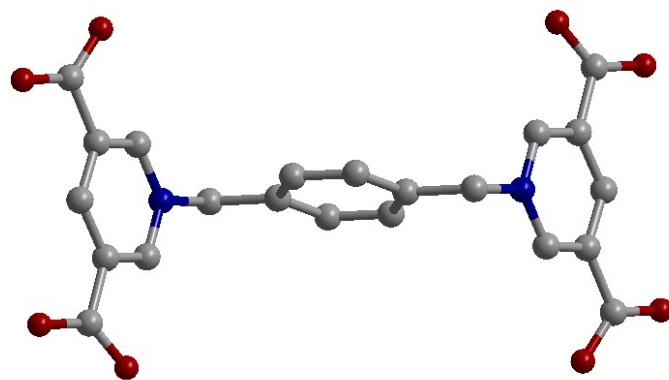

Fig. S1 Chemical structure of twisted organic ligand.

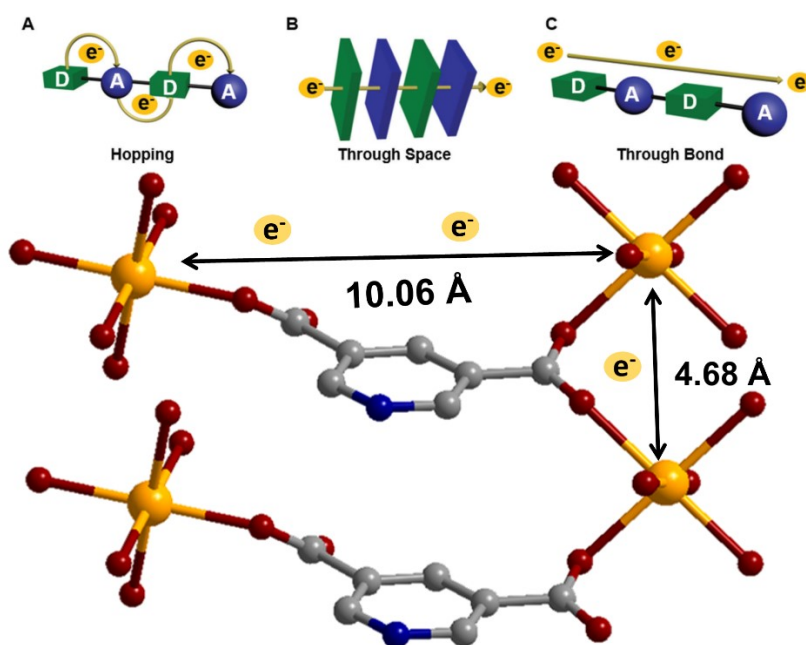

Fig. S2 The possible modes of charge transfer in Cd-MOF.

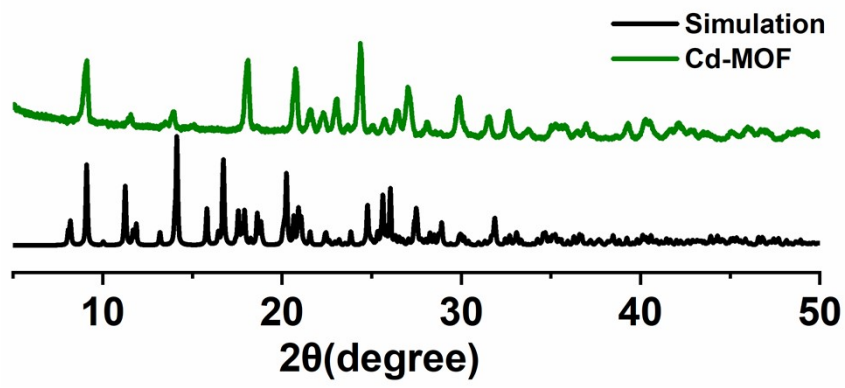

Fig. S3 PXR D pattern of Cd-MOF.

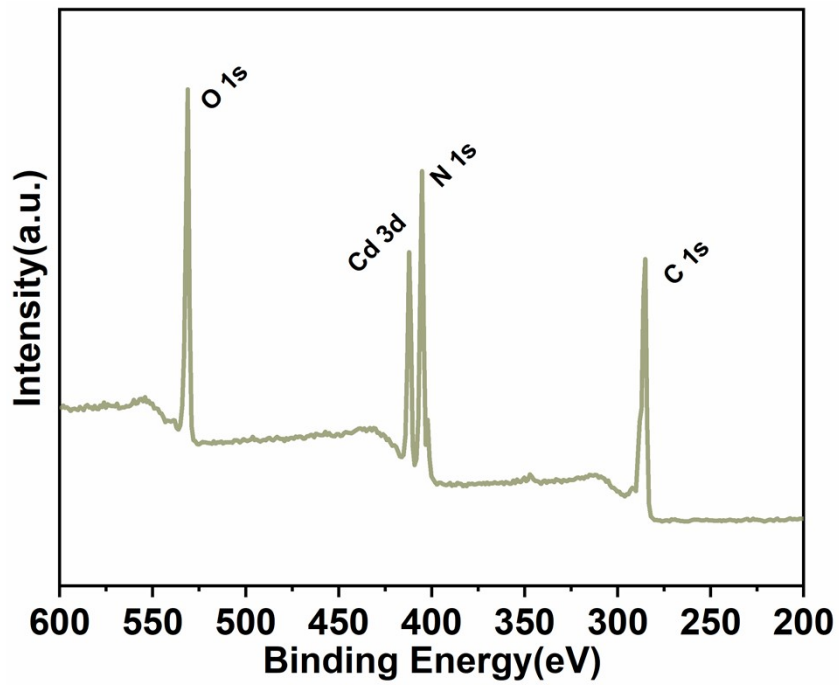

Fig. S4 XPS full spectra of Cd-MOF.

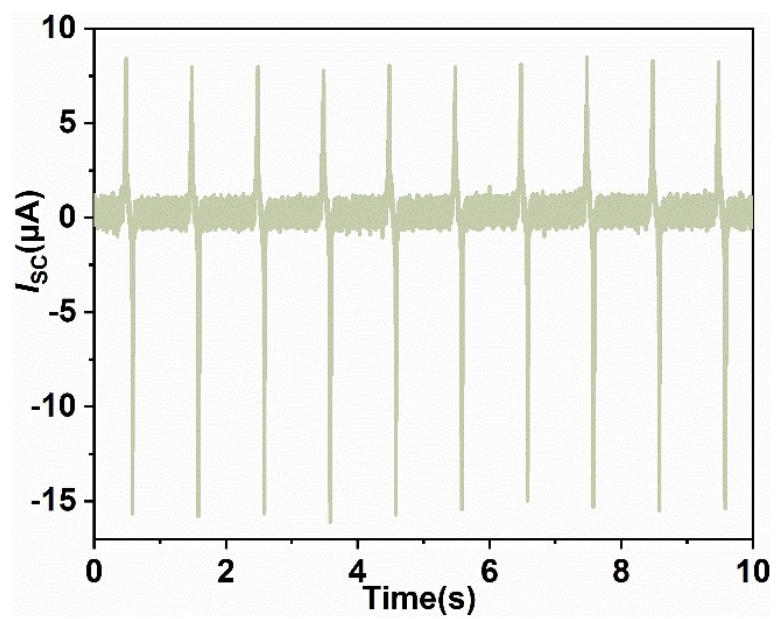

Fig. S5  $I_{sc}$  of Cd-MT at 1 Hz.

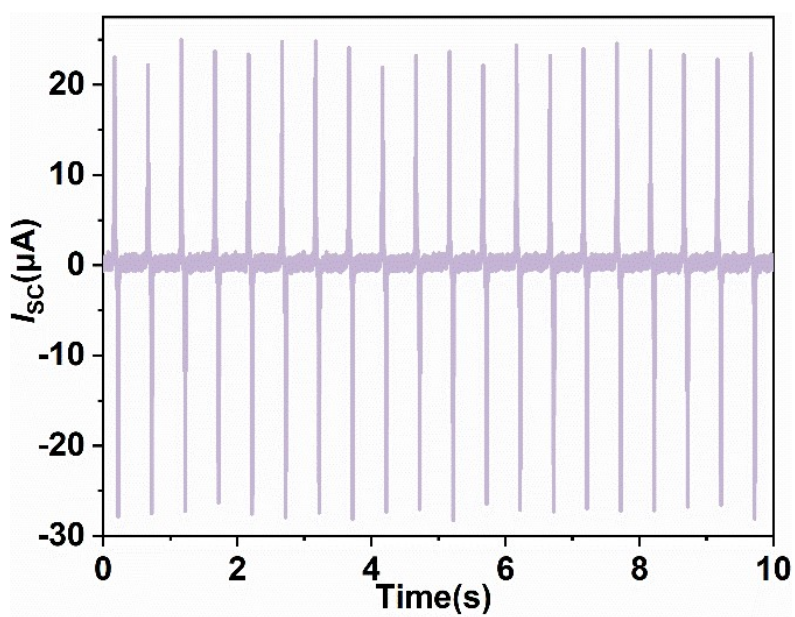

Fig. S6  $I_{sc}$  of Cd-MT at 2 Hz.

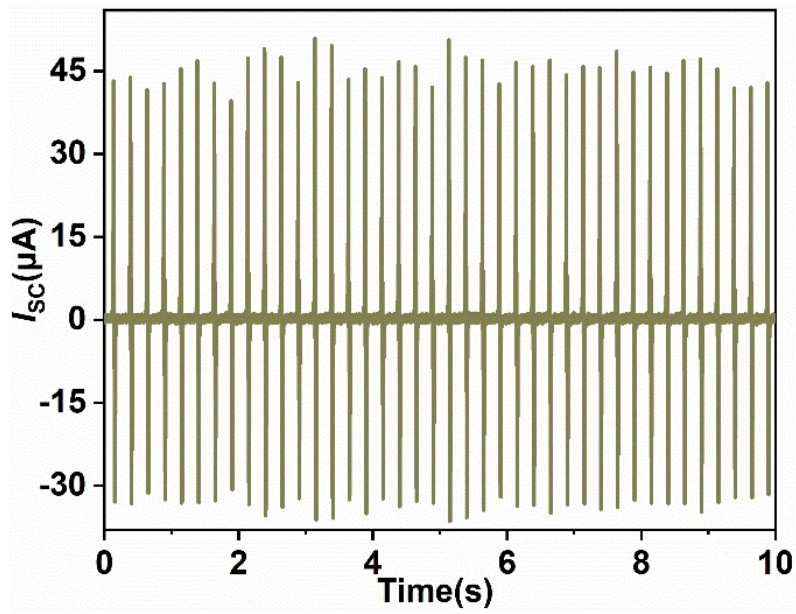

Fig. S7  $I_{sc}$  of Cd-MT at 4 Hz.

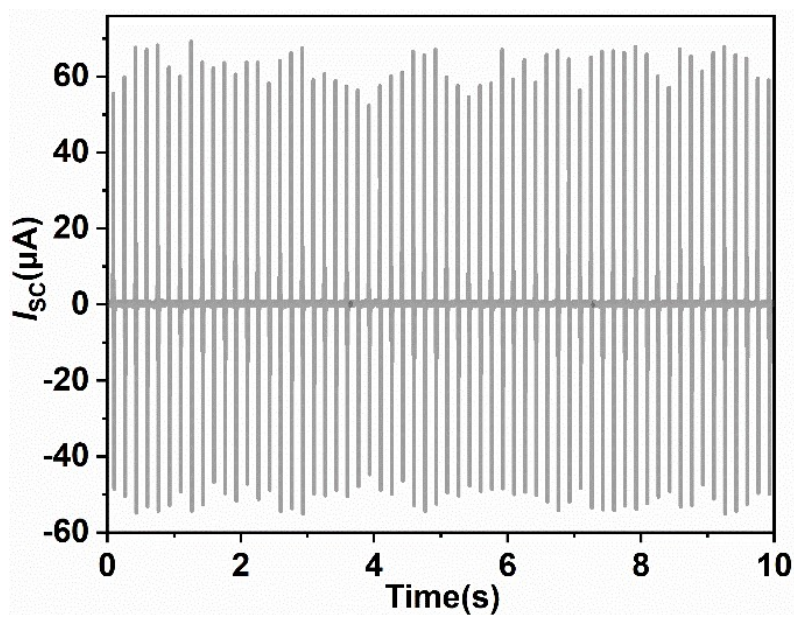

Fig. S8  $I_{sc}$  of Cd-MT at 6 Hz.

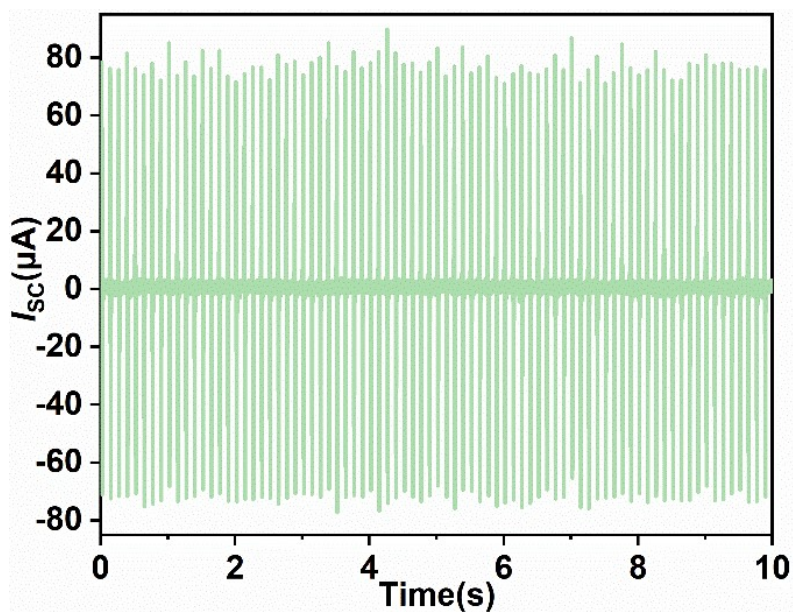

Fig. S9  $I_{sc}$  of Cd-MT at 8 Hz.

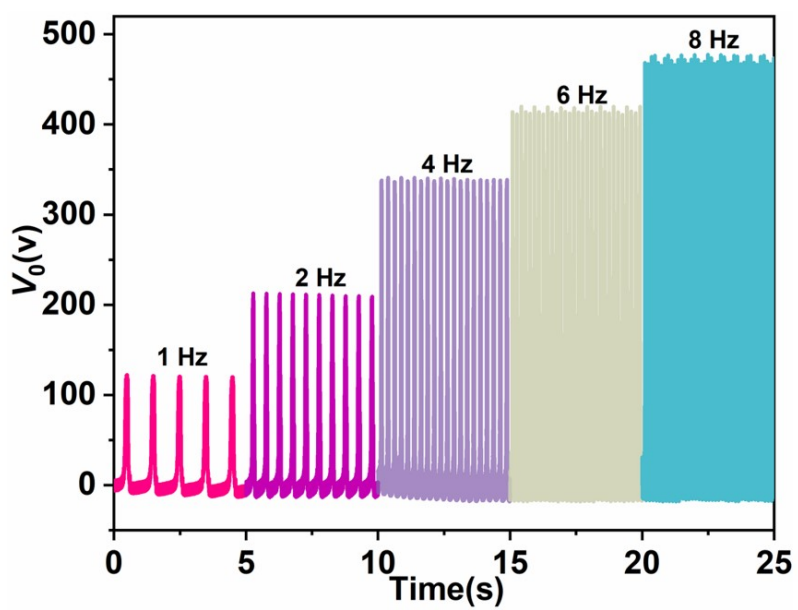

Fig. S10  $V_0$  of Cd-MT at different frequency.



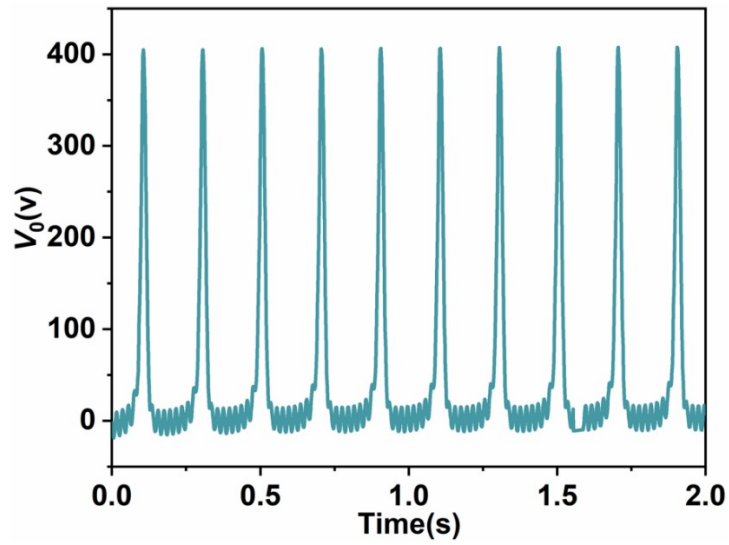

**Fig. S11**  $V_0$  of Cd-MT at 5 Hz.

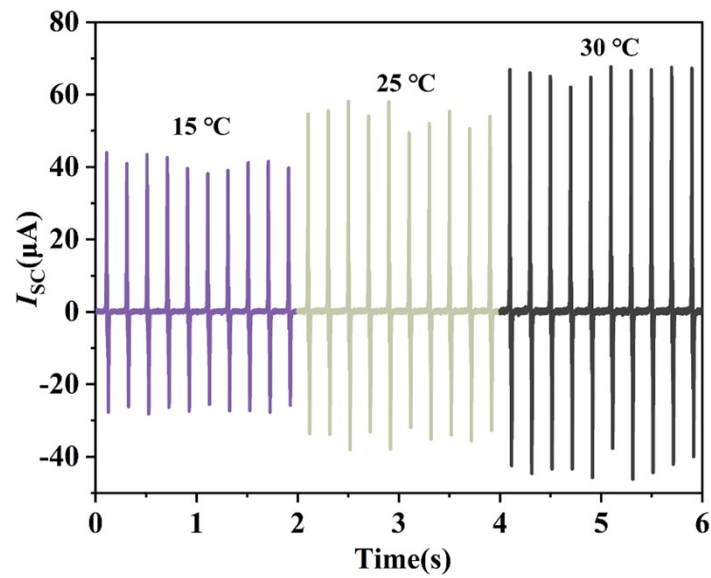

**Fig. S12** Effect of temperature on output performance in Cd-MT.

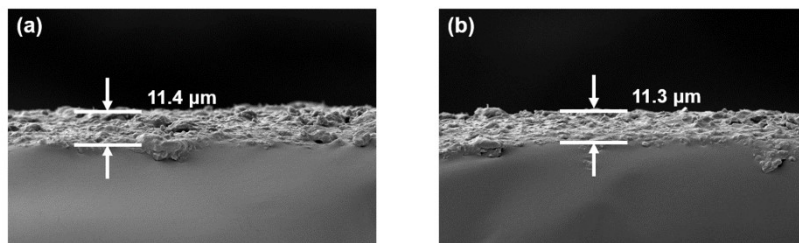

**Fig. S13** SEM images of Cd-MOF on the Cu layer (a) before and (b) after testing.



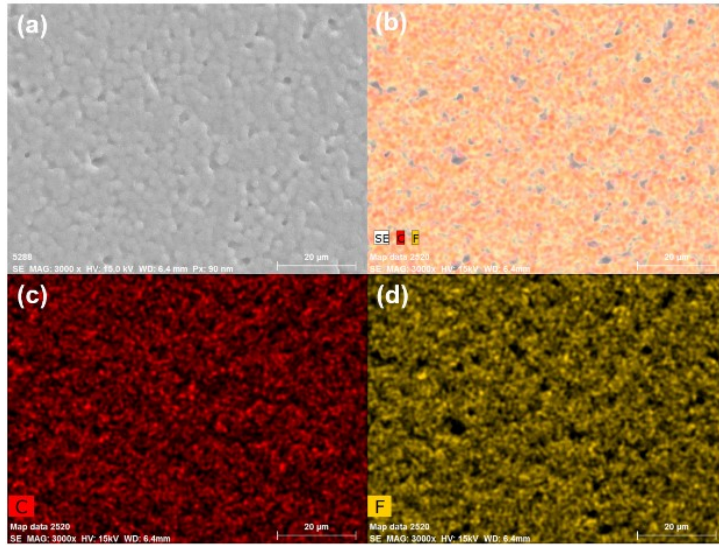

**Fig. S14** EDS elemental analysis of PVDF layer.

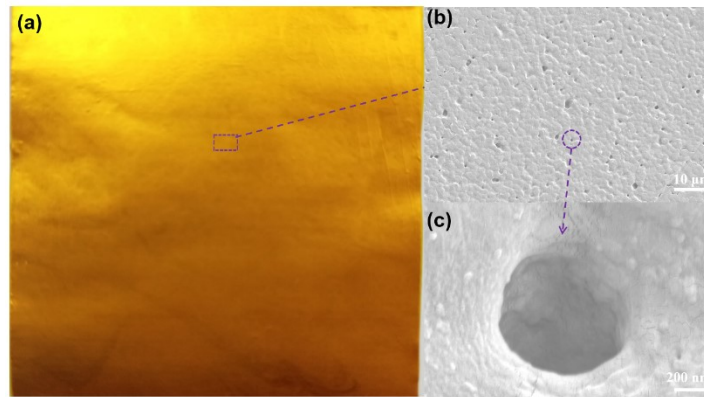

**Fig. S15** High-definition digital and SEM images of PVDF layer.

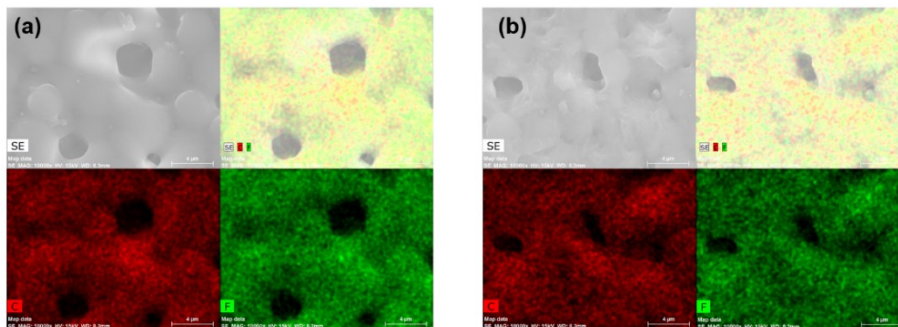

**Fig. S16** EDS images of PVDF layer (a) before and (b) after testing.

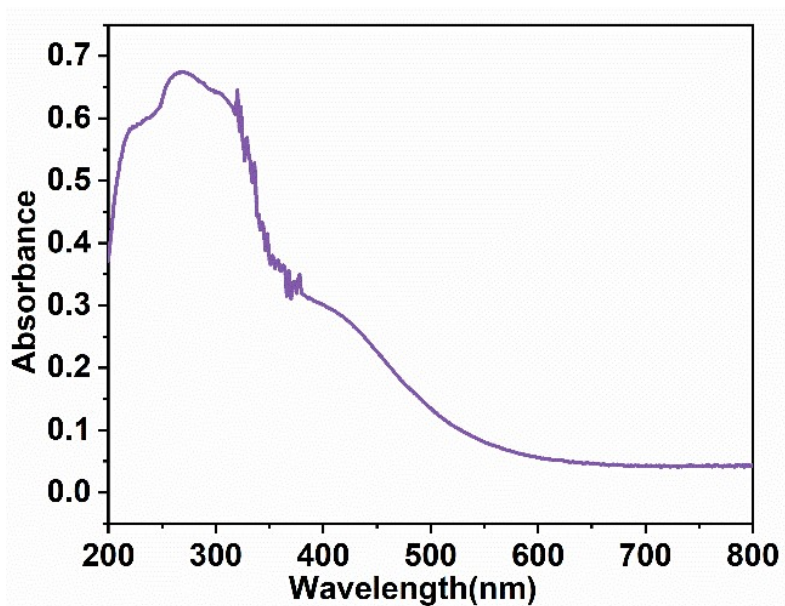

Fig. S17 Uv-vis spectra of Cd-MOF.

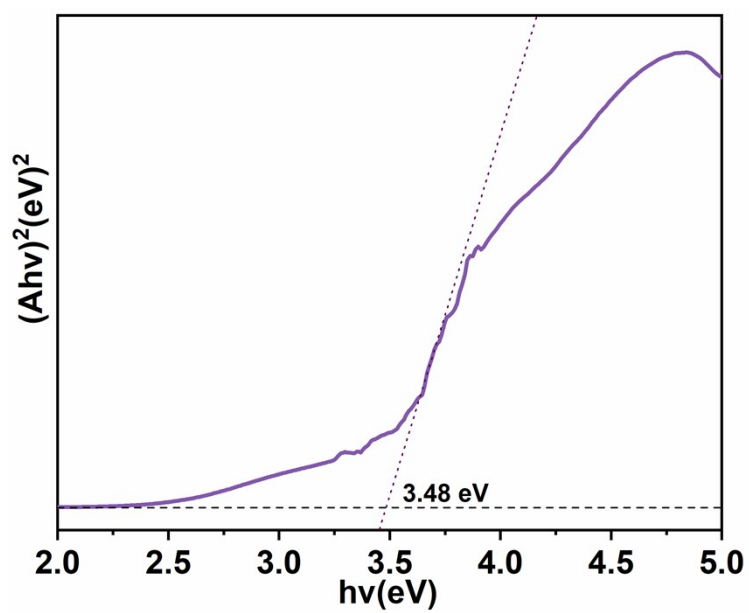

Fig. S18 Tauc plot of Cd-MOF.

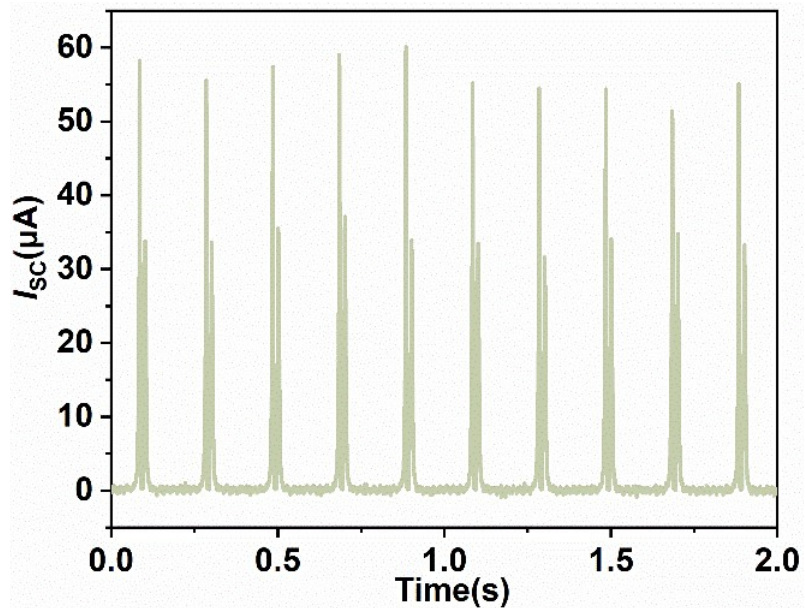

Fig. S19  $I_{sc}$  of Cd-MT through a rectifier bridge.

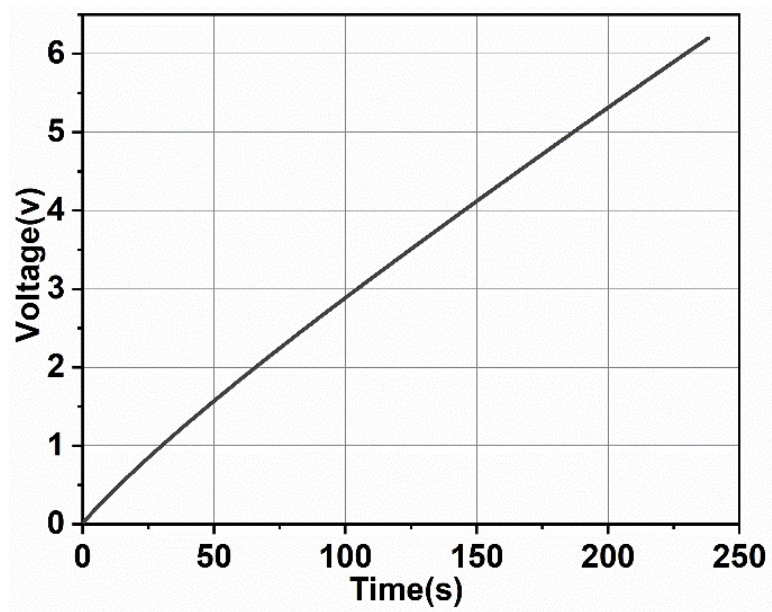

Fig. S20 The charging of 100  $\mu\text{F}$  capacitor using Cd-MT at 5Hz.

**Table S1** Crystallographic data and structure refinement details for Cd-MOF.

| Compound                                 | Cd-MOF                                                           |
|------------------------------------------|------------------------------------------------------------------|
| Formula                                  | C <sub>22</sub> H <sub>14</sub> N <sub>2</sub> O <sub>8</sub> Cd |
| Mr                                       | 546.76                                                           |
| T/K                                      | 273 K                                                            |
| I (Mo–Ka)/Å                              | 0.71073                                                          |
| Crystal system                           | Triclinic                                                        |
| Space group                              | <i>P</i> 2 <sub>1</sub> / <i>c</i>                               |
| a/Å                                      | 4.6802(7)                                                        |
| b/Å                                      | 15.507(2)                                                        |
| c/Å                                      | 12.8345(17)                                                      |
| α (deg)                                  | 90                                                               |
| β (deg)                                  | 93.757(5)                                                        |
| γ (deg)                                  | 90                                                               |
| V (Å <sup>3</sup> )                      | 929.5(2)                                                         |
| Z                                        | 2                                                                |
| D <sub>calcd</sub> (g cm <sup>-3</sup> ) | 1.954                                                            |
| F(000)                                   | 544.0                                                            |
| μ (mm <sup>-1</sup> )                    | 1.235                                                            |
| R <sub>1</sub> (I > 2σ(I))               | 0.0398                                                           |
| wR <sub>2</sub> (I > 2σ(I))              | 0.1091                                                           |

$R = [\sum || F_0 | - | F_c | | / \sum | F_0 | ], R_w = \sum_w [ | F_0^2 - F_c^2 |^2 / \sum_w ( | F_w |^2 )^2]^{1/2}$

**Table S2** Selected bond lengths (Å) and bond angles (deg) for Cd-MOF crystal structure description.

| Cd-MOF          |            |                                                                |            |
|-----------------|------------|----------------------------------------------------------------|------------|
| Cd1—O2          | 2.233 (3)  | Cd1—O3ii                                                       | 2.327 (3)  |
| Cd1—O4i         | 2.279 (3)  | O2iii—Cd1—O4i                                                  | 92.62 (11) |
| O4i—Cd1—O3ii    | 94.81 (11) | O2—Cd1—O4i                                                     | 87.38 (11) |
| O4iv—Cd1—O3ii   | 85.19 (11) | O2iii—Cd1—O4iv                                                 | 87.38 (11) |
| O2iii—Cd1—O3v   | 86.01 (11) | O2—Cd1—O4iv                                                    | 92.62 (11) |
| O2—Cd1—O3v      | 93.99 (11) | O2iii—Cd1—O3ii                                                 | 93.99 (11) |
| O4i—Cd1—O3v     | 85.19 (11) | O2—Cd1—O3ii                                                    | 86.01 (11) |
| O4iv—Cd1—O3v    | 94.81 (11) |                                                                |            |
|                 |            | #1 x+1, -y+1/2, z-1/2; #2 -x+2, y+1/2, -z+1/2;                 |            |
| Symmetry codes: |            | #3 -x+2, -y+1, -z; #4 -x+1, y+1/2, -z+1/2; #5 x, -y+1/2, z-1/2 |            |
